# Supplementary material for: Photostriction in CaTiO3 ceramics under the illumination of a light emitting diode
Source: Royal Society of Chemistry journal article supplement (doi:10.1039/d3tc03911k), 2023-12-19
Supplement: d3tc03911k1.pdf [file d3tc03911k1.pdf]

## Supplementary Information

### Photostriction in $\text{CaTiO}_3$ ceramics under the illumination of light emitting diode

Muzaffar Ahmad Boda<sup>1</sup>, Chen Chen<sup>1</sup>, Xiang He<sup>1</sup>, Lu Wang<sup>1</sup>, Zhiguo Yi<sup>1,2,\*</sup>

<sup>1</sup>State Key Laboratory of High Performance Ceramics and Superfine Microstructure, Shanghai Institute of Ceramics, Chinese Academy of Sciences, Shanghai, China

<sup>2</sup>Center of Materials Science and Optoelectronics Engineering, University of Chinese Academy of Sciences, Beijing, China

\*Corresponding author, email: [zhiguo@mail.sic.ac.cn](mailto:zhiguo@mail.sic.ac.cn)

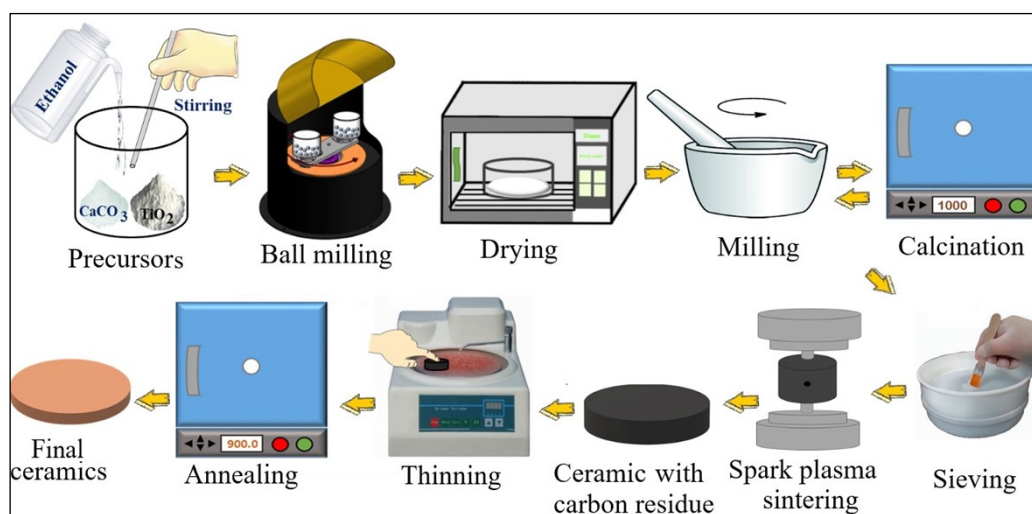

**Fig. S1** Schematic representation of the routemap followed in the synthesis of  $\text{CaTiO}_3$  ceramics.

**Photostriction measurement:** Based on the research work of B. Kundy's et al [1], the home made setup, as schematically shown in Fig. S1, was used for the photostriction measurement. At first, the  $\text{CaTiO}_3$  ceramic sample with dimensions  $2 \times 7 \times 0.3 \text{ mm}^3$  was placed at the sample stage and then the suspended part of the sample was irradiated. The photoinduced elongation in the sample pushes the sensitive electrode and thereby changes the separation between the sensitive and base electrode. The corresponding change in the capacitance is measured by an automatic component analyser (TH2838 Automatic Component Analyzer, Tonghui, China). The photostriction  $\lambda = \Delta L/L$  is calculated by using the following equations;

$$\lambda = \Delta L/L = (L_2 - L_1)/L$$

$$L_1 = 254.3 - 515.9 \times e^{-C_1/38.6} - 124.3 \times e^{-C_1/38.59} - 158.6 \times e^{-C_1/583.58}$$

$$L_2 = 254.3 - 515.9 \times e^{-C_2/38.6} - 124.3 \times e^{-C_2/38.59} - 158.6 \times e^{-C_2/583.58}$$

where  $C_1$  is the capacitance value before illumination,  $C_2$  is the capacitance value under illumination,  $L$  is the length of the sample subjected to laser irradiation (which turns out to be 4 mm under LED's 365 and 405 nm, and 3.2 mm under laser light 405 nm).

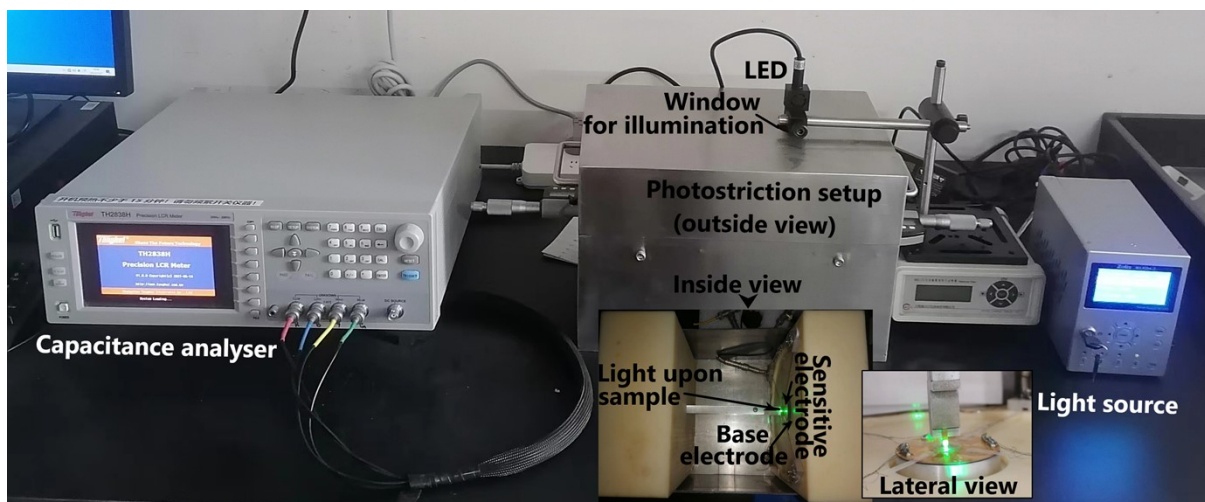

**Fig. S2** Schematic representation of photostriction measuring setup.

**Table S1.** Comparison of the photostrictive parameters of CaTiO<sub>3</sub> ceramics with that of the reported materials.

| Material                                                                  | Light              |                         | Photostriction               |                                   |
|---------------------------------------------------------------------------|--------------------|-------------------------|------------------------------|-----------------------------------|
|                                                                           | Wavelength<br>(nm) | Intensity/fluence       | Response<br>$\Delta L/L$ (%) | Efficiency<br>(m <sup>3</sup> /W) |
| PLZT ceramics <sup>2</sup>                                                | 365                | 150 W/m <sup>2</sup>    | 0.01                         | 3.3*10 <sup>-10</sup>             |
| BiFeO <sub>3</sub> crystal <sup>1</sup>                                   | 365                | 326 W/m <sup>2</sup>    | 0.003                        | 8.2*10 <sup>-12</sup>             |
| CH <sub>3</sub> NH <sub>3</sub> PbBr <sub>3</sub><br>crystal <sup>3</sup> | 532                | 60 W/cm <sup>2</sup>    | - 1.25                       | - 5.6*10 <sup>-11</sup>           |
| PbTiO <sub>3</sub> film <sup>4</sup>                                      | 400                | 4.8 mJ/cm <sup>2</sup>  | 0.25                         | 5.2*10 <sup>-26</sup>             |
| BiFeO <sub>3</sub> film <sup>5</sup>                                      | 400                | 2 mJ/cm <sup>2</sup>    | 0.46                         | 4*10 <sup>-25</sup>               |
| BaTiO <sub>3</sub> crystal <sup>6</sup>                                   | 405                | 4.8 mJ cm <sup>-2</sup> | 0.25                         | 5.2*10 <sup>-26</sup>             |
| BNNPT ceramic <sup>7</sup>                                                | 520                | 67.6                    | 0.38                         | 1.1*10 <sup>-11</sup>             |
| MAPbI <sub>3</sub> film <sup>8</sup>                                      | 532                | 1 kW/m <sup>2</sup>     | 0.125                        | 5.0*10 <sup>-12</sup>             |
| SrRuO <sub>3</sub> film <sup>9</sup>                                      | 532                | 625 kW/m <sup>2</sup>   | 1.12                         | 7.0*10 <sup>-16</sup>             |
| Te film <sup>10</sup>                                                     | 633                | 34                      | 0.01                         | 2.6*10 <sup>-16</sup>             |
| CaFe <sub>2</sub> O <sub>4</sub><br>ceramic <sup>11</sup>                 | 405                | 25                      | 0.13                         | 1.3*10 <sup>-11</sup>             |
|                                                                           | 520                | 25                      | 0.11                         | 1.1*10 <sup>-11</sup>             |
|                                                                           | 655                | 25                      | 0.16                         | 1.0*10 <sup>-11</sup>             |
| CaCuTi <sub>4</sub> O <sub>12</sub><br>ceramics <sup>12</sup>             | 520                | 67.6 kW/m <sup>2</sup>  | 0.31                         | 9.2*10 <sup>-12</sup>             |
|                                                                           | 655                | 41.2 kW/m <sup>2</sup>  | 0.17                         | 8.3*10 <sup>-12</sup>             |
| Zn <sub>3</sub> V <sub>2</sub> O <sub>8</sub><br>ceramics <sup>13</sup>   | 405                | 18 kW/m <sup>2</sup>    | 0.08                         | 8.8*10 <sup>-12</sup>             |
|                                                                           | 655                | 18 kW/m <sup>2</sup>    | 0.05                         | 5.5*10 <sup>-12</sup>             |
| Mg <sub>3</sub> V <sub>2</sub> O <sub>8</sub><br>Ceramics <sup>14</sup>   | 405                | 3 kW/m <sup>2</sup>     | 0.015                        | 1.0*10 <sup>-11</sup>             |
|                                                                           | 520                | 20 kW/m <sup>2</sup>    | 0.09                         | 9.0*10 <sup>-12</sup>             |
|                                                                           | 655                | 3 kW/m <sup>2</sup>     | 0.024                        | 1.5*10 <sup>-11</sup>             |
| <b>CaTiO<sub>3</sub></b>                                                  | LED-365            | 2 kW/m <sup>2</sup>     | 0.015                        | 0.22 × 10 <sup>-10</sup>          |
| <b>ceramics</b>                                                           | LED-405            | 2 kW/m <sup>2</sup>     | 0.012                        | 0.19 × 10 <sup>-10</sup>          |

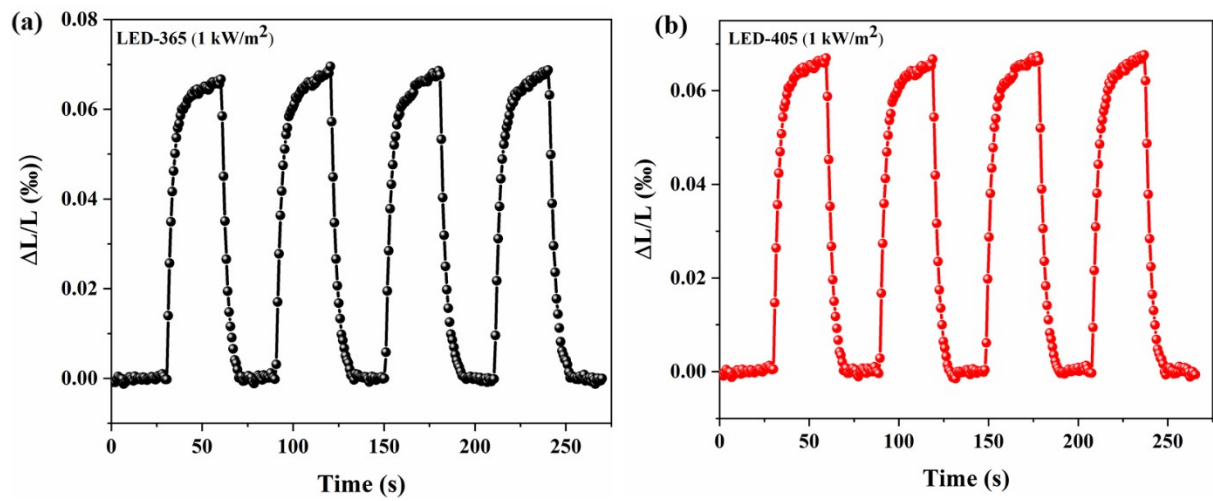

**Fig. S3** Reproducibility of photostriction  $\Delta L/L$  of  $\text{CaTiO}_3$  ceramic sample at 1 sun illumination under; (a) LED 365 nm, and (b) 405 nm.

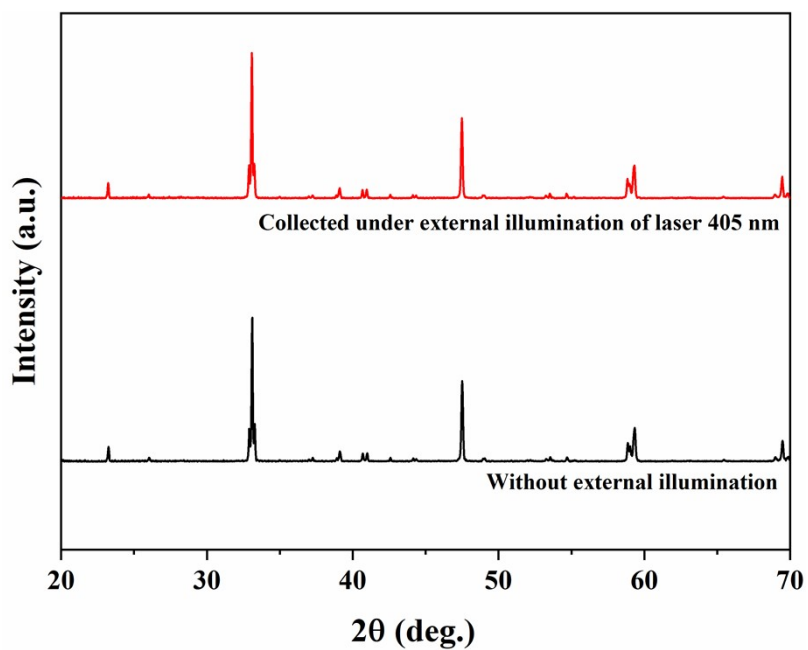

**Fig. S4.** X-ray diffraction patterns of CaTiO<sub>3</sub> ceramic collected with and without external laser illumination.

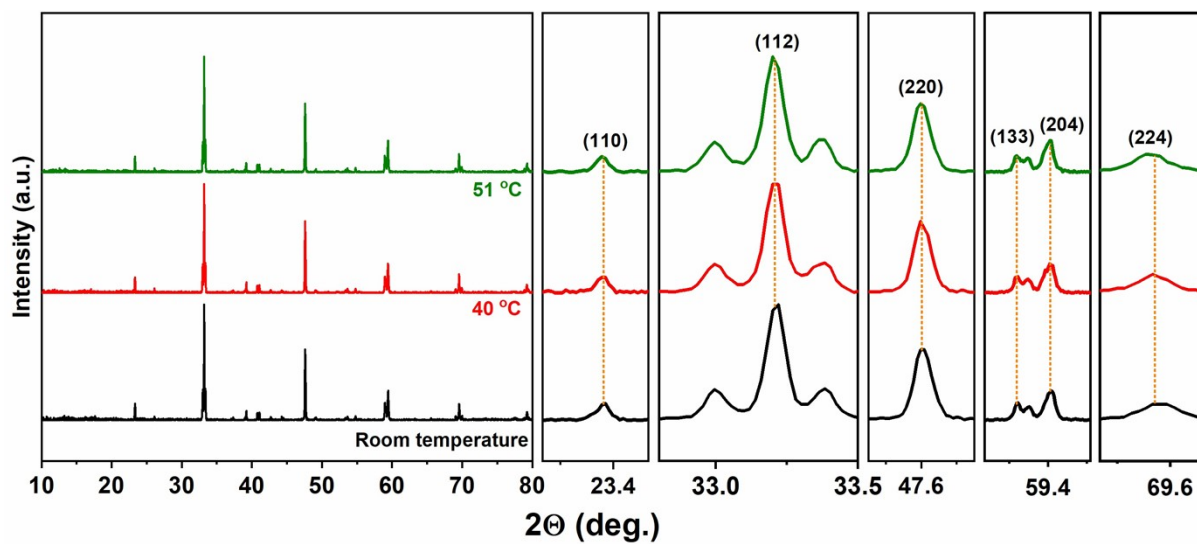

**Fig. S5** Temperature dependent X-ray diffraction patterns of CaTiO<sub>3</sub> ceramics.

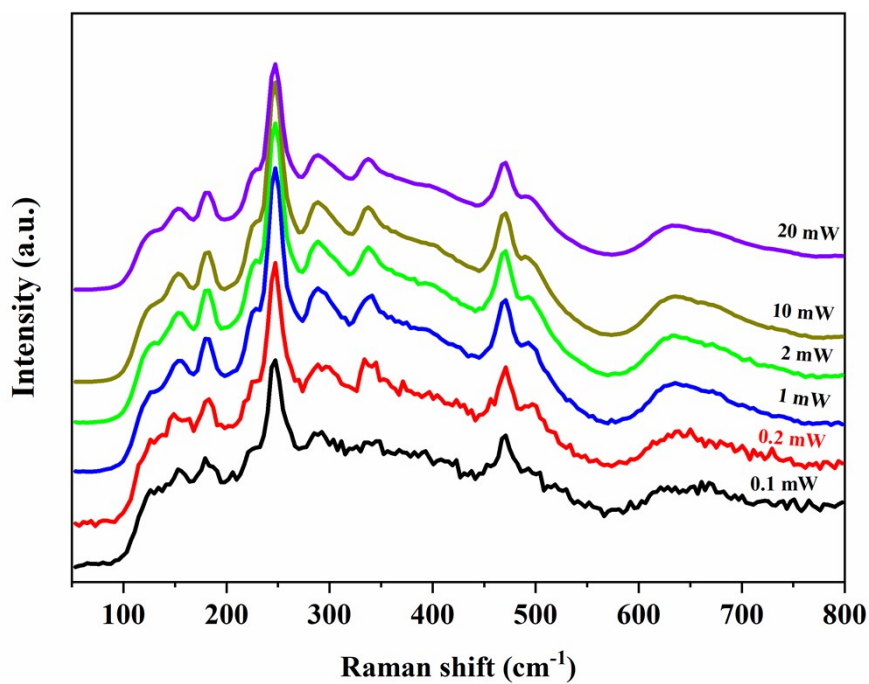

**Fig. S6** Raman spectra's of CaTiO<sub>3</sub> ceramics at various laser (473 nm) powers.

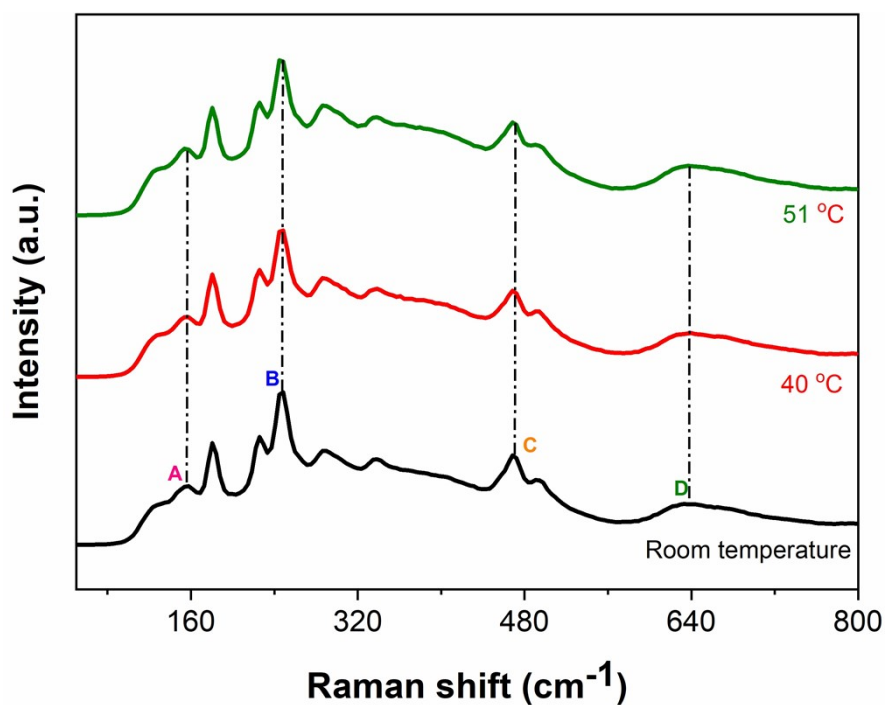

**Fig. S7** Temperature dependent Raman spectra's of CaTiO<sub>3</sub> ceramics recorded while excitation wavelength 473 nm (at power of 20 mW).

## References

- 1 B. Kundys, M. Viret, D. Colson, D.O. Kundys, *Nat. Mater.* 2010, **9**, 803–805.
- 2 K. Takagi, S. Kikuchi, J.-F. Li, H. Okamura, R. Watanabe, A. Kawasaki, *J. Am. Ceram. Soc.*, 2004, **87**, 1477–1482.
- 3 T. Wei, H. Wang, T. Li, C. Lin, Y. Hsieh, Y. Chu, J. He, *Adv. Mat.*, 2017, 29, 1701789.
- 4 D. Daranciang, M.J. Highland, H. Wen, S.M. Young, N.C. Brandt, H.Y. Hwang, M. Vattilana, M. Nicoul, F. Quirin, J. Goodfellow, T. Qi, I. Grinberg, D.M. Fritz, M. Cammarata, D. Zhu, H.T. Lemke, D.A. Walko, E.M. Dufresne, Y. Li, J. Larsson, D.A. Reis, K. Sokolowski-Tinten, K.A. Nelson, A.M. Rappe, P.H. Fuoss, G.B. Stephenson, A.M. Lindenberg, *Phys. Rev. Lett.*, 2012, **108**, 087601.
- 5 D. Schick, M. Herzog, H. Wen, P. Chen, C. Adamo, P. Gaal, D.G. Schlom, P.G. Evans, Y. Li, M. Bargheer, *Phys. Rev. Lett.*, 2014, **112**, 097602.
- 6 F. Rubio-Marcos, D.A. Ochoa, A. Del Campo, M.A. Garcia, G.R. Castro, J.F. Fernandez, J.E. Garcia, *Nat. Photon.*, 2018, **12**, 29–32.
- 7 X. Li, C. Chen, F. Zhang, X. Huang, Z. Yi, *APL Mater.* 2020, **8**, 061111.
- 8 Y. Zhou, L. You, S. Wang, Z. Ku, H. Fan, D. Schmidt, A. Rusydi, L. Chang, L. Wang, P. Ren, L. Chen, G. Yuan, L. Chen, J. Wang, *Nat. Commun.* 2016, **7**, 11193.
- 9 T.-C. Wei, H.-P. Wang, H.-J. Liu, D.-S. Tsai, J.-J. Ke, C.-L. Wu, Y.-P. Yin, Q. Zhan, G.-R. Lin, Y.-H. Chu, J.-H. He, *Nat. Commun.* 8 (2017) 15018.
- 10 S. Gayathri, S. S, G. Singh, B.N. Shivananju, S. Asokan, *Sens. and Act. A: Phys.*, 2018, **279**, 688–693.
- 11 X. Li, C. Chen, F. Zhang, H. Fang, X. Huang, Z. Yi, *ACS Appl. Electron. Mater.* 3 (2021) 2534–2542.
- 12 X. Li, C. Chen, F. Zhang, X. Huang, Z. Yi, *Appl. Phys. Lett.*, 2020, **116**, 112901.
- 13 M.A. Boda, X. He, C. Chen, Z. Yi, *Appl. Phys. Lett.*, 2021, **119**, 221905.
- 14 M.A. Boda, C. Chen, X. He, L. Wang, Z. Yi, *J. Am. Ceram. Soc.* 2023, **106**, 3584–3593.
